# Supplementary material for: Identification of the unique subtype of macrophages in aneurysm lesions at the growth phase
Source: Research Square preprint supplement (doi:10.21203/rs.3.rs-1756113/v1), 2022-06-23
Supplement: Supplementary file 1 [file 117b1aff21836e7e2421b32d.xlsx]

## Sheet: Sheet 1
Table 3. Up-represented terms in macrophages from enlarging aneurysm lesions at the growth phase compared with in vitro-differentiated M0 in gene ontology analysis (Biological Process).
Biological Process	P value
Sensory perception of taste	8.1e-05
Response to pheromone	0.028
Neuropeptide signaling pathway	0.028
Humoral immune response	0.028
Antimicrobial humoral response	0.075
Serotonin receptor signaling pathway	0.098
Sensory perception of bitter taste	0.14
Antimicrobial humoral immune response mediated by antimicrobial peptide	0.14
G protein-coupled serotonin receptor signaling pathway	0.16
Defense response to bacterium	0.16
