# Supplementary material for: Identification of the unique subtype of macrophages in aneurysm lesions at the growth phase
Source: Research Square preprint supplement (doi:10.21203/rs.3.rs-1756113/v1), 2022-06-23
Supplement: Supplementary file 2 [file 86ef2679d8ca446e30d17de7.xlsx]

## Sheet: Sheet 1
Table 9. Down-represented terms in macrophages from enlarging aneurysm lesions at the growth phase compared with in vitro-differentiated M0 in gene ontology analysis (Biological Process).
Biological Process	P value
Ubiquitin-dependent protein catabolic process	3.6e-20
Proteasomal protein catabolic process	7e-18
Regulation of cellular protein localization	3.6e-17
Proteasome-mediated ubiquitin-dependent protein catabolic process	4.8e-17
Mitochondrion organization	4.8e-17
Regulation of protein catabolic process	5.6e-17
Apoptotic signaling pathway	8.2e-16
Positive regulation of catabolic process	4.5e-15
Golgi vesicle transport	1.1e-14
Autophagy	1.3e-14
Process utilizing autophagic mechanism	1.3e-14
Protein localization to membrane	2.3e-14
MRNA processing	1.2e-13
Positive regulation of cellular catabolic process	3.2e-13
Cell cycle phase transition	3.2e-13
Carbohydrate derivative biosynthetic process	4.4e-13
Establishment of protein localization to organelle	5.6e-13
Positive regulation of protein catabolic process	7.9e-13
Regulation of cellular protein catabolic process	1.4e-12
Regulation of protein stability	2.7e-12
Response to endoplasmic reticulum stress	3.8e-12
Endosomal transport	5.3e-12
Regulation of apoptotic signaling pathway	7.3e-12
Vesicle organization	7.4e-12
Mitotic cell cycle phase transition	9.8e-12
Regulation of mitotic cell cycle	1.5e-11
Intrinsic apoptotic signaling pathway	1.8e-11
Positive regulation of cell migration	2e-11
Endomembrane system organization	3.9e-11
Regulation of protein modification by small protein conjugation or removal	4.2e-11
Positive regulation of cell motility	5.1e-11
Positive regulation of cellular component movement	5.5e-11
Regulation of cell cycle phase transition	6.3e-11
Macroautophagy	1.2e-10
Positive regulation of locomotion	1.2e-10
Positive regulation of cellular protein localization	1.4e-10
Protein localization to nucleus	1.4e-10
RNA splicing	1.5e-10
Posttranscriptional regulation of gene expression	1.9e-10
Organelle localization	2.1e-10
Positive regulation of cellular protein catabolic process	2.6e-10
Regulation of cytoskeleton organization	3e-10
Negative regulation of intracellular signal transduction	3.7e-10
Regulation of ubiquitin-dependent protein catabolic process	3.8e-10
Response to oxidative stress	4.1e-10
DNA repair	4.2e-10
Small GTPase mediated signal transduction	6.9e-10
Regulation of mitotic cell cycle phase transition	1e-09
Regulation of cellular amide metabolic process	1e-09
Regulation of proteasomal ubiquitin-dependent protein catabolic process	1.6e-09
NcRNA processing	2.1e-09
Regulation of proteolysis involved in cellular protein catabolic process	2.3e-09
Cell division	2.3e-09
Regulation of DNA metabolic process	2.5e-09
Positive regulation of organelle organization	3.2e-09
Golgi organization	3.6e-09
Protein localization to plasma membrane	3.6e-09
Nuclear transport	3.6e-09
Regulation of protein ubiquitination	3.8e-09
Mitochondrial transport	4.1e-09
Nucleocytoplasmic transport	4.3e-09
Cytosolic transport	6.3e-09
Negative regulation of cell cycle	6.3e-09
Establishment of protein localization to membrane	6.5e-09
Organophosphate biosynthetic process	6.5e-09
Ameboidal-type cell migration	7.4e-09
DNA replication	8.4e-09
RNA splicing, via transesterification reactions	8.8e-09
RNA splicing, via transesterification reactions with bulged adenosine as nucleophile	8.8e-09
MRNA splicing, via spliceosome	8.8e-09
Cellular component disassembly	8.8e-09
Ras protein signal transduction	1.1e-08
Regulation of establishment of protein localization	1.1e-08
Negative regulation of protein modification process	1.5e-08
Regulation of intracellular transport	1.6e-08
Dephosphorylation	1.6e-08
Vacuole organization	1.7e-08
Extrinsic apoptotic signaling pathway	1.7e-08
Negative regulation of apoptotic signaling pathway	1.7e-08
Protein localization to cell periphery	1.7e-08
Regulation of protein kinase activity	1.7e-08
NcRNA metabolic process	1.8e-08
Mitotic nuclear division	2e-08
Cellular response to chemical stress	2e-08
Regulation of translation	2e-08
Cellular nitrogen compound catabolic process	2e-08
Regulation of proteasomal protein catabolic process	2.2e-08
Positive regulation of apoptotic process	2.3e-08
Nucleobase-containing compound catabolic process	2.5e-08
Negative regulation of cell cycle process	2.6e-08
Negative regulation of cell cycle phase transition	2.7e-08
Establishment of organelle localization	2.8e-08
Regulation of autophagy	3.2e-08
Positive regulation of proteolysis involved in cellular protein catabolic process	3.3e-08
Glycoprotein metabolic process	3.3e-08
Positive regulation of programmed cell death	3.8e-08
Positive regulation of establishment of protein localization	4.2e-08
Heterocycle catabolic process	4.2e-08
Positive regulation of proteolysis	4.4e-08
Positive regulation of ubiquitin-dependent protein catabolic process	4.5e-08
Positive regulation of proteasomal ubiquitin-dependent protein catabolic process	4.7e-08
Positive regulation of cell death	4.7e-08
Regulation of binding	5.3e-08
Regulation of supramolecular fiber organization	5.3e-08
Regulation of protein-containing complex assembly	6e-08
Response to peptide	7.9e-08
Protein polyubiquitination	8.5e-08
Response to ionizing radiation	8.6e-08
Glycoprotein biosynthetic process	9.5e-08
Positive regulation of proteasomal protein catabolic process	1.1e-07
Regulation of response to DNA damage stimulus	1.1e-07
Cellular response to oxidative stress	1.1e-07
Cellular response to external stimulus	1.1e-07
Regulation of mRNA metabolic process	1.3e-07
Protein targeting	1.4e-07
Aromatic compound catabolic process	1.4e-07
Histone modification	1.4e-07
Regulation of protein transport	1.5e-07
Energy derivation by oxidation of organic compounds	1.7e-07
Vesicle budding from membrane	1.9e-07
Epithelial cell migration	1.9e-07
Regulation of GTPase activity	1.9e-07
Transmembrane receptor protein tyrosine kinase signaling pathway	1.9e-07
Regulation of intrinsic apoptotic signaling pathway	2e-07
Cell growth	2e-07
Ribonucleoprotein complex biogenesis	2.2e-07
Protein stabilization	2.3e-07
Positive regulation of cell projection organization	2.8e-07
Regulation of cellular component size	3.2e-07
Protein dephosphorylation	3.4e-07
Mitotic sister chromatid segregation	3.5e-07
Response to reactive oxygen species	3.5e-07
Positive regulation of protein modification by small protein conjugation or removal	3.6e-07
Epithelium migration	3.9e-07
Retrograde transport, endosome to Golgi	4.1e-07
Negative regulation of intrinsic apoptotic signaling pathway	5.7e-07
Cell cycle G1/S phase transition	7.5e-07
Peptidyl-lysine modification	7.5e-07
Negative regulation of organelle organization	8.5e-07
Organic cyclic compound catabolic process	9.1e-07
Cellular respiration	9.3e-07
Tissue migration	9.3e-07
Regulation of actin filament-based process	9.5e-07
Microtubule cytoskeleton organization involved in mitosis	1.1e-06
Regulation of epithelial cell migration	1.1e-06
Positive regulation of protein transport	1.2e-06
Protein import	1.3e-06
Phospholipid biosynthetic process	1.3e-06
Regulation of cell morphogenesis	1.3e-06
RNA catabolic process	1.4e-06
Regulation of neuron projection development	1.5e-06
Response to hydrogen peroxide	1.6e-06
G1/S transition of mitotic cell cycle	1.6e-06
Spindle organization	1.8e-06
Negative regulation of cellular catabolic process	1.8e-06
Organelle disassembly	1.9e-06
Negative regulation of phosphorus metabolic process	1.9e-06
Negative regulation of phosphate metabolic process	1.9e-06
Positive regulation of cellular component biogenesis	1.9e-06
Negative regulation of catabolic process	2e-06
Regulation of actin cytoskeleton organization	2.1e-06
Negative regulation of mitotic cell cycle	2.2e-06
Cell cycle checkpoint signaling	2.4e-06
Cellular response to abiotic stimulus	2.5e-06
Cellular response to environmental stimulus	2.5e-06
Cellular response to organonitrogen compound	2.5e-06
Regulation of growth	2.5e-06
Response to peptide hormone	2.6e-06
Regulation of extrinsic apoptotic signaling pathway	2.7e-06
Mitochondrial membrane organization	2.9e-06
Establishment of protein localization to mitochondrion	3e-06
Response to topologically incorrect protein	3.1e-06
Negative regulation of mitotic cell cycle phase transition	3.1e-06
Regulation of organelle assembly	3.1e-06
Protein acylation	3.1e-06
Negative regulation of protein phosphorylation	3.3e-06
Generation of precursor metabolites and energy	3.5e-06
Mitochondrial respiratory chain complex assembly	3.6e-06
Positive regulation of transferase activity	3.6e-06
In utero embryonic development	3.6e-06
Transport along microtubule	3.7e-06
Double-strand break repair	3.7e-06
Autophagosome organization	3.9e-06
Regulation of protein serine/threonine kinase activity	3.9e-06
Positive regulation of epithelial cell migration	4e-06
Cellular response to topologically incorrect protein	4.1e-06
Post-Golgi vesicle-mediated transport	4.4e-06
Regulation of microtubule cytoskeleton organization	4.7e-06
Response to starvation	4.8e-06
Regulation of response to endoplasmic reticulum stress	4.9e-06
Peptidyl-serine phosphorylation	5e-06
Cellular response to transforming growth factor beta stimulus	5.1e-06
Regulation of cell growth	5.1e-06
Vacuolar transport	5.2e-06
Response to transforming growth factor beta	5.2e-06
Response to radiation	5.2e-06
Aerobic respiration	5.7e-06
Regulation of protein localization to membrane	6e-06
Positive regulation of DNA metabolic process	6.1e-06
Lipid biosynthetic process	6.1e-06
Vesicle-mediated transport to the plasma membrane	6.3e-06
Cellular response to hormone stimulus	6.4e-06
Fat cell differentiation	6.5e-06
Negative regulation of phosphorylation	6.8e-06
Regulation of cell cycle G1/S phase transition	6.9e-06
Regulation of actin filament organization	6.9e-06
Cellular response to peptide	7.2e-06
Maintenance of protein location	7.3e-06
Autophagosome assembly	7.3e-06
Positive regulation of intracellular transport	7.3e-06
Sister chromatid segregation	7.5e-06
Nucleobase-containing small molecule metabolic process	8e-06
Regulation of protein localization to plasma membrane	8.1e-06
Signal transduction in response to DNA damage	8.2e-06
Protein polymerization	8.3e-06
Regulation of intracellular protein transport	8.5e-06
Endothelial cell migration	8.6e-06
Nuclear export	8.8e-06
Cytokinesis	8.8e-06
Phospholipid metabolic process	8.9e-06
Regulation of chromosome organization	9.5e-06
Cellular response to extracellular stimulus	9.5e-06
Regulation of G1/S transition of mitotic cell cycle	9.8e-06
Regulation of mRNA processing	9.8e-06
Response to UV	9.9e-06
Protein glycosylation	9.9e-06
Macromolecule glycosylation	9.9e-06
Positive regulation of cellular amide metabolic process	1e-05
Intrinsic apoptotic signaling pathway in response to DNA damage	1.1e-05
Protein folding	1.1e-05
Cellular response to starvation	1.1e-05
Peptidyl-serine modification	1.1e-05
Positive regulation of cell cycle	1.1e-05
ERAD pathway	1.2e-05
Regulation of protein localization to cell periphery	1.2e-05
Regulation of protein binding	1.2e-05
Actin filament organization	1.2e-05
Positive regulation of GTPase activity	1.3e-05
Mitochondrial gene expression	1.4e-05
Sulfur compound biosynthetic process	1.4e-05
Mitotic spindle organization	1.4e-05
Glycerolipid biosynthetic process	1.4e-05
Maintenance of protein localization in organelle	1.5e-05
DNA-dependent DNA replication	1.5e-05
Cellular response to nutrient levels	1.7e-05
Glycosylation	1.7e-05
Regulation of anatomical structure size	1.7e-05
Cytoskeleton-dependent intracellular transport	1.8e-05
Glycerophospholipid metabolic process	2e-05
Maintenance of location	2e-05
Response to oxygen levels	2e-05
Protein localization to mitochondrion	2.1e-05
Signal transduction by p53 class mediator	2.1e-05
ER-nucleus signaling pathway	2.6e-05
Extracellular matrix organization	2.9e-05
Viral process	2.9e-05
DNA biosynthetic process	3e-05
Aging	3e-05
Regulation of TOR signaling	3.1e-05
Cellular response to reactive oxygen species	3.1e-05
Angiogenesis	3.1e-05
Translational initiation	3.3e-05
Protein modification by small protein removal	3.3e-05
Extracellular structure organization	3.3e-05
Positive regulation of protein ubiquitination	3.6e-05
Skeletal system development	3.6e-05
External encapsulating structure organization	3.7e-05
RRNA metabolic process	4e-05
Protein deubiquitination	4.1e-05
Response to unfolded protein	4.3e-05
Regulation of DNA replication	4.4e-05
Cell-substrate junction organization	4.6e-05
Positive regulation of translation	4.6e-05
Positive regulation of autophagy	4.6e-05
Peptidyl-threonine modification	5e-05
Establishment or maintenance of cell polarity	5.1e-05
Maintenance of protein location in cell	5.2e-05
TOR signaling	5.2e-05
Cell-cell signaling by wnt	5.2e-05
Glycerophospholipid biosynthetic process	5.5e-05
Protein acetylation	5.5e-05
MRNA catabolic process	5.5e-05
Wnt signaling pathway	5.5e-05
Establishment of vesicle localization	5.8e-05
Regulation of macroautophagy	6.3e-05
Positive regulation of supramolecular fiber organization	6.3e-05
Organelle fission	6.3e-05
Mitotic cytokinesis	6.7e-05
Regulation of microtubule-based process	6.8e-05
Response to acid chemical	6.9e-05
Response to inorganic substance	7.2e-05
Ribonucleotide biosynthetic process	7.3e-05
Regulation of protein polymerization	7.5e-05
Regulation of protein localization to nucleus	7.6e-05
Vesicle localization	7.6e-05
Endoplasmic reticulum unfolded protein response	8e-05
Regulation of DNA repair	8e-05
Regulation of cell development	8e-05
Purine-containing compound biosynthetic process	8.1e-05
Cellular response to radiation	8.2e-05
Response to amino acid	8.3e-05
Non-membrane-bounded organelle assembly	8.4e-05
Telomere organization	8.5e-05
Regulation of Wnt signaling pathway	8.5e-05
Cellular response to unfolded protein	8.6e-05
Negative regulation of transferase activity	8.6e-05
Cell-substrate junction assembly	8.9e-05
Positive regulation of intracellular protein transport	9e-05
Homeostasis of number of cells	9e-05
Positive regulation of cell cycle process	9.3e-05
Endoplasmic reticulum to Golgi vesicle-mediated transport	9.4e-05
Response to hypoxia	9.8e-05
Methylation	9.8e-05
Protein localization to endoplasmic reticulum	0.0001
Telomere maintenance	0.0001
Protein import into nucleus	0.0001
Transforming growth factor beta receptor signaling pathway	0.0001
RRNA processing	0.0001
Cell projection assembly	0.0001
DNA integrity checkpoint signaling	0.00011
Mitotic cell cycle checkpoint signaling	0.00011
RNA modification	0.00011
Ribose phosphate biosynthetic process	0.00011
Negative regulation of cellular amide metabolic process	0.00011
Bone development	0.00011
Response to gamma radiation	0.00012
DNA duplex unwinding	0.00012
Protein-containing complex localization	0.00012
Plasma membrane bounded cell projection assembly	0.00012
Positive regulation of protein localization to membrane	0.00013
Regulation of endothelial cell migration	0.00013
Response to decreased oxygen levels	0.00013
Regulation of vesicle-mediated transport	0.00013
Glycerolipid metabolic process	0.00013
Regulation of DNA biosynthetic process	0.00014
Chromosome segregation	0.00014
Endocytosis	0.00014
Cellular response to ionizing radiation	0.00015
Peptidyl-threonine phosphorylation	0.00015
Positive regulation of mitotic cell cycle	0.00015
Import into nucleus	0.00015
Response to insulin	0.00015
Protein targeting to mitochondrion	0.00016
Protein localization to cytoskeleton	0.00016
Electron transport chain	0.00016
Regulation of cell size	0.00016
Neural tube development	0.00016
Regulation of DNA-binding transcription factor activity	0.00016
NADH dehydrogenase complex assembly	0.00017
Mitochondrial respiratory chain complex I assembly	0.00017
DNA geometric change	0.00017
DNA damage checkpoint signaling	0.00017
TRNA processing	0.00017
Peptidyl-lysine acetylation	0.00017
Positive regulation of cytoskeleton organization	0.00017
Negative regulation of locomotion	0.00017
Cellular response to hydrogen peroxide	0.00018
Nucleotide biosynthetic process	0.00018
Negative regulation of response to endoplasmic reticulum stress	0.00019
Mitotic sister chromatid separation	0.00019
Cellular response to amino acid stimulus	0.00019
Cellular response to acid chemical	0.00019
Cell-substrate adhesion	0.00019
RNA polyadenylation	0.0002
Protein export from nucleus	0.0002
Intrinsic apoptotic signaling pathway in response to endoplasmic reticulum stress	0.0002
Regulation of RNA splicing	0.0002
Developmental growth involved in morphogenesis	0.0002
Mitochondrial translation	0.00021
Regulation of chromosome segregation	0.00021
Cell aging	0.00021
Actin polymerization or depolymerization	0.00021
Cellular response to peptide hormone stimulus	0.00021
Autophagy of mitochondrion	0.00022
Mitochondrion disassembly	0.00022
Nucleoside phosphate biosynthetic process	0.00022
Negative regulation of cellular component movement	0.00022
Protein maturation	0.00022
Regulation of sister chromatid segregation	0.00023
RNA 3 -end processing	0.00024
Apoptotic mitochondrial changes	0.00024
Regulation of nucleocytoplasmic transport	0.00024
Ribosome biogenesis	0.00024
Sulfur compound metabolic process	0.00024
Positive regulation of kinase activity	0.00024
Vesicle targeting	0.00025
Cytoplasmic microtubule organization	0.00025
Protein O-linked glycosylation	0.00025
Negative regulation of protein catabolic process	0.00025
Protein-containing complex disassembly	0.00026
Response to extracellular stimulus	0.00026
Positive regulation of protein kinase activity	0.00027
Organelle transport along microtubule	0.00028
Amyloid precursor protein metabolic process	0.00028
Purine ribonucleotide biosynthetic process	0.00028
Epithelial to mesenchymal transition	0.00028
Microtubule-based transport	0.00028
Mitotic metaphase plate congression	0.00029
Platelet-derived growth factor receptor signaling pathway	0.00029
Nuclear division	0.0003
Biological process involved in interaction with host	0.00031
Regulation of actin polymerization or depolymerization	0.00032
MRNA polyadenylation	0.00033
Positive regulation of extrinsic apoptotic signaling pathway	0.00033
Cell cycle G2/M phase transition	0.00033
Internal protein amino acid acetylation	0.00033
Internal peptidyl-lysine acetylation	0.00033
Negative regulation of kinase activity	0.00033
Focal adhesion assembly	0.00035
Protein localization to microtubule cytoskeleton	0.00037
COPII-coated vesicle budding	0.00039
Regulation of response to cytokine stimulus	0.00039
Regulation of mitochondrion organization	0.00039
Purine nucleotide biosynthetic process	0.00039
Negative regulation of translation	0.00039
Carbohydrate metabolic process	0.00039
Myeloid cell homeostasis	0.00041
Regulation of cell-substrate adhesion	0.00041
Establishment of protein localization to plasma membrane	0.00042
Regulation of actin filament length	0.00042
Negative regulation of protein kinase activity	0.00042
Nucleic acid phosphodiester bond hydrolysis	0.00042
Mitochondrial transmembrane transport	0.00043
Negative regulation of protein ubiquitination	0.00044
Extrinsic apoptotic signaling pathway via death domain receptors	0.00044
Protein lipidation	0.00044
Substrate adhesion-dependent cell spreading	0.00044
Positive regulation of apoptotic signaling pathway	0.00044
Positive regulation of neuron projection development	0.00044
Nucleotide metabolic process	0.00044
Actin filament polymerization	0.00045
Regulation of canonical Wnt signaling pathway	0.00045
Positive regulation of protein-containing complex assembly	0.00045
Regulation of mitotic spindle organization	0.00046
Ossification	0.00046
Nucleoside phosphate metabolic process	0.00046
Regulation of mRNA splicing, via spliceosome	0.00047
Regulation of actin filament polymerization	0.00047
Negative regulation of protein modification by small protein conjugation or removal	0.00048
Negative regulation of cell motility	0.00048
Protein quality control for misfolded or incompletely synthesized proteins	0.00049
Regulation of chromosome separation	0.00049
Histone acetylation	0.00049
Macromolecule methylation	0.00049
Response to amino acid starvation	0.0005
Endosome organization	0.0005
Metaphase/anaphase transition of mitotic cell cycle	0.0005
Regulation of mitotic sister chromatid separation	0.0005
Nucleoside triphosphate metabolic process	0.0005
Negative regulation of cellular protein localization	0.0005
Positive regulation of Wnt signaling pathway	0.0005
Neuron death	0.0005
G2/M transition of mitotic cell cycle	0.00051
Establishment of cell polarity	0.00051
Regulation of endocytosis	0.00051
Response to nutrient levels	0.00052
Cytoskeleton-dependent cytokinesis	0.00053
Positive regulation of endothelial cell migration	0.00054
Neural tube formation	0.00054
Positive regulation of cell cycle phase transition	0.00055
Positive regulation of mitotic cell cycle phase transition	0.00056
Protein localization to endosome	0.00058
Cell-matrix adhesion	0.00059
Regulation of small GTPase mediated signal transduction	0.00059
Aerobic electron transport chain	0.0006
Cell morphogenesis involved in neuron differentiation	0.0006
Ubiquitin-dependent ERAD pathway	0.00062
Organelle fusion	0.00062
Endocytic recycling	0.00063
Protein phosphopantetheinylation	0.00066
Negative regulation of binding	0.00066
Positive regulation of protein localization to plasma membrane	0.00067
Metaphase/anaphase transition of cell cycle	0.00068
Regulation of cell morphogenesis involved in differentiation	0.00068
Contractile actin filament bundle assembly	0.00069
Stress fiber assembly	0.00069
Positive regulation of canonical Wnt signaling pathway	0.00071
Positive regulation of cell development	0.00071
Regulation of signal transduction by p53 class mediator	0.00074
RNA phosphodiester bond hydrolysis	0.00074
Golgi to plasma membrane transport	0.00075
Respiratory electron transport chain	0.00076
Cellular response to amino acid starvation	0.00077
Establishment of protein localization to mitochondrial membrane	0.00078
Selective autophagy	0.00081
Cellular response to UV	0.00081
Cellular response to lipid	0.00081
Protein N-linked glycosylation	0.00083
Regulation of cell-substrate junction organization	0.00083
Biological process involved in symbiotic interaction	0.00083
Positive regulation of neurogenesis	0.00083
Small molecule biosynthetic process	0.00083
Cellular response to insulin stimulus	0.00085
I-kappaB kinase/NF-kappaB signaling	0.00087
Regulation of MAPK cascade	0.00087
Regulation of cytokine-mediated signaling pathway	0.00091
Axonogenesis	0.00091
Regulation of mitotic nuclear division	0.00093
Cellular response to gamma radiation	0.00094
Regulation of cell-matrix adhesion	0.00094
Regulation of spindle organization	0.00095
Regulation of mitotic metaphase/anaphase transition	0.00095
MRNA 3 -end processing	0.00095
Blood vessel endothelial cell migration	0.00095
RNA localization	0.00095
Positive regulation of binding	0.00095
Cytokinetic process	0.00097
Protein transmembrane transport	0.00097
Lysosomal transport	0.00097
Clathrin-dependent endocytosis	0.001
Positive regulation of protein localization to cell periphery	0.001
Positive regulation of protein localization to nucleus	0.001
Axon extension	0.001
Protein localization to Golgi apparatus	0.0011
Signal transduction in absence of ligand	0.0011
Extrinsic apoptotic signaling pathway in absence of ligand	0.0011
ATP synthesis coupled electron transport	0.0011
Metaphase plate congression	0.0011
Regulation of telomere maintenance	0.0011
Endoplasmic reticulum organization	0.0011
Lipoprotein metabolic process	0.0011
Viral life cycle	0.0011
Fibroblast migration	0.0012
Collagen fibril organization	0.0012
Muscle cell migration	0.0012
Spindle assembly	0.0012
Oxidative phosphorylation	0.0012
Tube closure	0.0012
Mesenchymal cell differentiation	0.0012
Actin filament bundle organization	0.0012
Regulation of RNA stability	0.0012
Regulation of small molecule metabolic process	0.0012
Ribonucleotide metabolic process	0.0012
Transmembrane receptor protein serine/threonine kinase signaling pathway	0.0012
Purine-containing compound metabolic process	0.0012
Negative regulation of cell cycle G1/S phase transition	0.0013
Regulation of metaphase/anaphase transition of cell cycle	0.0013
Axo-dendritic transport	0.0013
Lysosome organization	0.0013
Lytic vacuole organization	0.0013
Lipoprotein biosynthetic process	0.0013
Neural tube closure	0.0013
Regulation of fat cell differentiation	0.0013
Microtubule polymerization or depolymerization	0.0013
Actin filament bundle assembly	0.0013
Regulation of cell projection assembly	0.0013
Actomyosin structure organization	0.0013
Regulation of plasma membrane bounded cell projection assembly	0.0013
Developmental cell growth	0.0013
Canonical Wnt signaling pathway	0.0013
Regulation of neurogenesis	0.0013
Morphogenesis of an epithelium	0.0013
Axon development	0.0013
Nucleotide-sugar metabolic process	0.0014
Regulation of ubiquitin-protein transferase activity	0.0014
Microtubule organizing center organization	0.0014
Transition metal ion homeostasis	0.0014
Regulation of dephosphorylation	0.0014
Negative regulation of cell migration	0.0014
Ribose phosphate metabolic process	0.0014
Negative regulation of mRNA processing	0.0015
Regulation of focal adhesion assembly	0.0015
Regulation of cell-substrate junction assembly	0.0015
Ribonucleoside triphosphate metabolic process	0.0015
Negative regulation of cellular protein catabolic process	0.0015
Collagen metabolic process	0.0015
Regulation of fibroblast proliferation	0.0015
Regulation of nuclear division	0.0015
Smooth muscle cell proliferation	0.0015
Cotranslational protein targeting to membrane	0.0016
Regulation of endoplasmic reticulum stress-induced intrinsic apoptotic signaling pathway	0.0016
Microtubule organizing center localization	0.0016
Protein K63-linked deubiquitination	0.0016
Cellular response to glucose starvation	0.0016
Intracellular protein transmembrane transport	0.0016
Negative regulation of G1/S transition of mitotic cell cycle	0.0016
Regulation of mRNA catabolic process	0.0016
TRNA metabolic process	0.0016
Negative regulation of growth	0.0016
Myeloid cell differentiation	0.0016
Regulation of angiogenesis	0.0016
Response to steroid hormone	0.0016
Regulation of DNA-dependent DNA replication	0.0017
Necrotic cell death	0.0017
RNA methylation	0.0017
Regulation of cell cycle G2/M phase transition	0.0017
Positive regulation of response to DNA damage stimulus	0.0017
Regulation of actin filament bundle assembly	0.0017
Regulation of smooth muscle cell proliferation	0.0017
Positive regulation of cell adhesion	0.0017
Regulation of cell shape	0.0018
Histone ubiquitination	0.0019
Intrinsic apoptotic signaling pathway by p53 class mediator	0.0019
Regulation of mitochondrial membrane potential	0.0019
Regulation of G2/M transition of mitotic cell cycle	0.0019
Fibroblast proliferation	0.0019
Primary neural tube formation	0.0019
Positive regulation of protein serine/threonine kinase activity	0.0019
Phosphatidylinositol metabolic process	0.0019
Response to light stimulus	0.0019
Gliogenesis	0.0019
Mitochondrial electron transport, NADH to ubiquinone	0.002
Hippo signaling	0.002
Negative regulation of G2/M transition of mitotic cell cycle	0.002
Regulation of membrane permeability	0.002
Mitochondrial ATP synthesis coupled electron transport	0.002
Positive regulation of DNA biosynthetic process	0.002
Regulation of stress fiber assembly	0.002
Protein autophosphorylation	0.002
SRP-dependent cotranslational protein targeting to membrane	0.0021
Intrinsic apoptotic signaling pathway in response to oxidative stress	0.0021
Regulation of mitochondrial membrane permeability	0.0021
Regulation of cellular response to growth factor stimulus	0.0021
Protein sumoylation	0.0022
Cellular response to mechanical stimulus	0.0022
Negative regulation of cysteine-type endopeptidase activity involved in apoptotic process	0.0022
Rho protein signal transduction	0.0022
Negative regulation of protein-containing complex assembly	0.0022
Maintenance of location in cell	0.0022
Regulation of neuron death	0.0022
Endoplasmic reticulum calcium ion homeostasis	0.0023
Spliceosomal complex assembly	0.0023
Negative regulation of extrinsic apoptotic signaling pathway	0.0023
NIK/NF-kappaB signaling	0.0023
Muscle cell proliferation	0.0023
Regulation of vasculature development	0.0023
Golgi to plasma membrane protein transport	0.0024
Mitotic spindle assembly	0.0024
Regulation of axonogenesis	0.0024
Regulation of mRNA stability	0.0024
Regulation of Ras protein signal transduction	0.0024
Negative regulation of cell growth	0.0024
Regulation of lipid metabolic process	0.0024
Cell surface receptor signaling pathway involved in cell-cell signaling	0.0024
Centrosome localization	0.0025
Negative regulation of DNA metabolic process	0.0025
Erythrocyte homeostasis	0.0025
Negative regulation of cell projection organization	0.0025
Lipid modification	0.0025
Purine nucleotide metabolic process	0.0025
Regulation of vacuole organization	0.0026
Negative regulation of cell cycle G2/M phase transition	0.0026
RNA-dependent DNA biosynthetic process	0.0026
Telomere maintenance via telomerase	0.0026
Cellular response to vascular endothelial growth factor stimulus	0.0026
Positive regulation of cell morphogenesis involved in differentiation	0.0026
Purine nucleoside triphosphate metabolic process	0.0026
Regulation of histone modification	0.0026
Cellular carbohydrate metabolic process	0.0026
Purine ribonucleotide metabolic process	0.0026
Mesenchyme development	0.0026
Telomere maintenance via telomere lengthening	0.0027
Regulation of gene expression, epigenetic	0.0027
Nuclear chromosome segregation	0.0027
Glycosaminoglycan biosynthetic process	0.0028
Amyloid precursor protein catabolic process	0.0028
Protein deacylation	0.0028
Centrosome cycle	0.0028
Regeneration	0.0028
Regulation of defense response	0.0028
Programmed necrotic cell death	0.0029
Positive regulation of macroautophagy	0.0029
Regulation of cytokinesis	0.0029
Organelle membrane fusion	0.0029
Embryonic epithelial tube formation	0.0029
Epithelial tube formation	0.0029
Regulation of I-kappaB kinase/NF-kappaB signaling	0.0029
Protein processing	0.0029
Proteoglycan biosynthetic process	0.003
Positive regulation of organelle assembly	0.003
Negative regulation of cysteine-type endopeptidase activity	0.003
Regulation of MAP kinase activity	0.003
Connective tissue development	0.003
Negative regulation of chromosome organization	0.0031
Positive regulation of cell growth	0.0031
Positive regulation of DNA-binding transcription factor activity	0.0031
Protein insertion into mitochondrial membrane	0.0032
Protein exit from endoplasmic reticulum	0.0032
Positive regulation of protein binding	0.0032
Cellular response to oxygen levels	0.0032
Regulation of protein kinase B signaling	0.0032
Regulation of nervous system development	0.0032
Maintenance of protein location in nucleus	0.0033
Mannosylation	0.0033
Cell redox homeostasis	0.0033
Retrograde vesicle-mediated transport, Golgi to endoplasmic reticulum	0.0033
TORC1 signaling	0.0033
Axonal transport	0.0033
Endoplasmic reticulum tubular network organization	0.0034
Positive regulation of mRNA metabolic process	0.0034
Macromolecule deacylation	0.0034
Response to virus	0.0034
Protein localization to microtubule organizing center	0.0035
Protein localization to chromosome	0.0035
Cellular response to decreased oxygen levels	0.0035
Neuron projection extension	0.0035
Ribonucleoprotein complex subunit organization	0.0035
Vesicle targeting, to, from or within Golgi	0.0036
Cytochrome complex assembly	0.0036
Double-strand break repair via nonhomologous end joining	0.0036
Nucleus organization	0.0036
Membrane lipid metabolic process	0.0036
Regulation of autophagosome assembly	0.0038
Negative regulation of supramolecular fiber organization	0.0038
Modulation by symbiont of host process	0.0039
Nucleoside bisphosphate biosynthetic process	0.0039
Ribonucleoside bisphosphate biosynthetic process	0.0039
Purine nucleoside bisphosphate biosynthetic process	0.0039
Regulation of telomere maintenance via telomerase	0.0039
Lamellipodium organization	0.0039
Fatty acid catabolic process	0.0039
Regulation of protein dephosphorylation	0.0039
Nuclear-transcribed mRNA catabolic process	0.0039
Response to arsenic-containing substance	0.004
Negative regulation of response to DNA damage stimulus	0.004
DNA-templated transcription, elongation	0.004
Postsynapse organization	0.004
Regulation of mitochondrial membrane permeability involved in apoptotic process	0.0041
Regulation of actomyosin structure organization	0.0041
Cellular response to hypoxia	0.0041
Sprouting angiogenesis	0.0041
Protein monoubiquitination	0.0042
Chromatin organization	0.0042
Regulation of double-strand break repair	0.0043
Chromosome localization	0.0043
Membrane fusion	0.0043
Negative regulation of DNA-binding transcription factor activity	0.0043
Tube formation	0.0043
Protein kinase B signaling	0.0043
Muscle tissue development	0.0043
Regulation of necrotic cell death	0.0044
Protein K48-linked ubiquitination	0.0044
Erythrocyte differentiation	0.0044
Negative regulation of hydrolase activity	0.0044
Protein localization to chromosome, telomeric region	0.0046
Positive regulation of cell cycle G1/S phase transition	0.0046
Positive regulation of mitochondrion organization	0.0047
Ribonucleoside triphosphate biosynthetic process	0.0047
Vesicle fusion	0.0047
Activation of GTPase activity	0.0047
Muscle cell differentiation	0.0047
Cellular response to organic cyclic compound	0.0047
Protein insertion into membrane	0.0048
TRNA modification	0.0048
Microtubule polymerization	0.0049
Regulation of blood vessel endothelial cell migration	0.0049
Positive regulation of protein polymerization	0.0049
Regulation of reactive oxygen species metabolic process	0.0049
Protein K11-linked ubiquitination	0.005
Acetyl-CoA metabolic process	0.005
Rac protein signal transduction	0.005
Phosphatidylinositol biosynthetic process	0.005
Negative regulation of proteolysis involved in cellular protein catabolic process	0.0051
Nucleobase-containing compound transport	0.0051
Late endosome to vacuole transport	0.0052
Chromosome separation	0.0053
Positive regulation of plasma membrane bounded cell projection assembly	0.0053
Response to leukemia inhibitory factor	0.0053
Positive regulation of NF-kappaB transcription factor activity	0.0053
Negative regulation of transport	0.0053
Negative regulation of autophagy	0.0054
Positive regulation of axonogenesis	0.0054
Regulation of spindle assembly	0.0055
Intraciliary transport	0.0055
Negative regulation of ubiquitin-dependent protein catabolic process	0.0055
Fatty acid beta-oxidation	0.0055
Regulation of developmental growth	0.0055
Response to wounding	0.0055
Amyloid-beta metabolic process	0.0056
Corpus callosum development	0.0057
Cellular protein-containing complex localization	0.0057
Response to mitochondrial depolarisation	0.0057
Positive regulation of DNA replication	0.0057
Nucleoside triphosphate biosynthetic process	0.0057
Actin cytoskeleton reorganization	0.0057
Cellular response to steroid hormone stimulus	0.0057
Regulation of mitochondrial gene expression	0.0058
Positive regulation of membrane permeability	0.0058
Pri-miRNA transcription by RNA polymerase II	0.0058
Positive regulation of DNA repair	0.0058
Purine ribonucleoside triphosphate metabolic process	0.0058
Insulin receptor signaling pathway	0.0058
Neuron apoptotic process	0.0058
Response to sterol depletion	0.0059
Negative regulation of mRNA metabolic process	0.0059
Regulation of cellular response to transforming growth factor beta stimulus	0.0059
Protein localization to centrosome	0.006
Regulation of smooth muscle cell migration	0.006
Cellular response to leukemia inhibitory factor	0.0061
Regulation of cysteine-type endopeptidase activity	0.0061
Regulation of transforming growth factor beta receptor signaling pathway	0.0062
Protein mannosylation	0.0063
Regulation of telomere maintenance via telomere lengthening	0.0063
Regulation of microtubule polymerization or depolymerization	0.0063
Protein K48-linked deubiquitination	0.0064
Mitotic cytokinetic process	0.0066
Membrane docking	0.0066
Protein deacetylation	0.0066
Regulation of fibroblast migration	0.0067
Cytokine-mediated signaling pathway	0.0067
Regulation of translation in response to stress	0.0068
Regulation of endoplasmic reticulum unfolded protein response	0.0068
Establishment of chromosome localization	0.0068
Positive regulation of angiogenesis	0.0068
Positive regulation of vasculature development	0.0068
Intracellular receptor signaling pathway	0.0068
Cartilage development	0.0068
Iron-sulfur cluster assembly	0.0069
Metallo-sulfur cluster assembly	0.0069
Regulation of intrinsic apoptotic signaling pathway in response to DNA damage	0.0069
Mitotic DNA integrity checkpoint signaling	0.0069
Cellular transition metal ion homeostasis	0.0069
Cardiac chamber development	0.0069
Regulation of cysteine-type endopeptidase activity involved in apoptotic process	0.0069
Urogenital system development	0.0069
Positive regulation of mitochondrial membrane permeability	0.007
Regulation of cellular ketone metabolic process	0.007
Dendrite development	0.007
ATP metabolic process	0.007
Early endosome to late endosome transport	0.0071
Regulation of epithelial cell proliferation	0.0071
Cellular response to misfolded protein	0.0072
Ribonucleoprotein complex assembly	0.0072
Epithelial cell proliferation	0.0072
Positive regulation of actin filament polymerization	0.0073
Vesicle-mediated transport between endosomal compartments	0.0074
Spindle localization	0.0074
Osteoblast differentiation	0.0074
Liver development	0.0075
Renal system development	0.0075
Transcription by RNA polymerase III	0.0076
Receptor-mediated endocytosis	0.0076
Positive regulation of nervous system development	0.0076
Protein targeting to vacuole	0.0077
Smooth muscle cell migration	0.0077
Regulation of inflammatory response	0.0077
Negative regulation of TOR signaling	0.0078
Regulation of amyloid precursor protein catabolic process	0.0078
Mitotic DNA damage checkpoint signaling	0.0078
Negative regulation of mRNA splicing, via spliceosome	0.0079
Cortical cytoskeleton organization	0.008
Protein localization to cilium	0.008
Stress-activated protein kinase signaling cascade	0.008
Acetyl-CoA biosynthetic process	0.0081
Retina vasculature development in camera-type eye	0.0082
Glucose import	0.0082
Positive regulation of protein secretion	0.0082
Cell cycle DNA replication	0.0083
DNA damage response, signal transduction by p53 class mediator	0.0083
Cardiac septum development	0.0083
Regulation of phosphatase activity	0.0083
Rhythmic process	0.0083
Regulation of programmed necrotic cell death	0.0084
Vascular associated smooth muscle cell proliferation	0.0084
Positive regulation of I-kappaB kinase/NF-kappaB signaling	0.0084
Monosaccharide metabolic process	0.0084
Negative regulation of macroautophagy	0.0085
Positive regulation of response to endoplasmic reticulum stress	0.0085
Negative regulation of neuron projection development	0.0085
Cell death in response to oxidative stress	0.0087
Regulation of mitochondrial translation	0.0089
Pore complex assembly	0.0089
Positive regulation of G1/S transition of mitotic cell cycle	0.0089
Regulation of vascular associated smooth muscle cell proliferation	0.0089
Negative regulation of protein binding	0.0089
Chondrocyte differentiation	0.0089
Positive regulation of nucleocytoplasmic transport	0.009
Pinocytosis	0.0091
Release of cytochrome c from mitochondria	0.0091
Endochondral bone morphogenesis	0.0091
Circadian regulation of gene expression	0.0091
Establishment of mitotic spindle localization	0.0093
Protein localization to vacuole	0.0093
Histone deacetylation	0.0093
Protein localization to extracellular region	0.0093
Myelination	0.0094
Establishment of protein localization to endoplasmic reticulum	0.0095
Regulation of protein acetylation	0.0095
Ensheathment of neurons	0.0095
Axon ensheathment	0.0095
Negative regulation of proteolysis	0.0095
Regulation of release of cytochrome c from mitochondria	0.0096
Positive regulation of growth	0.0096
Histone H2A ubiquitination	0.0097
Mitochondrial outer membrane permeabilization involved in programmed cell death	0.0097
Necroptotic process	0.0097
Regulation of mitotic sister chromatid segregation	0.0097
Regulation of protein-containing complex disassembly	0.0097
Negative regulation of cytoskeleton organization	0.0097
MRNA modification	0.0098
Endosome transport via multivesicular body sorting pathway	0.0098
Regulation of mRNA 3 -end processing	0.0098
Aminoglycan biosynthetic process	0.0098
Cellular senescence	0.0098
Iron ion homeostasis	0.0098
Receptor metabolic process	0.0098
Regulation of lipid biosynthetic process	0.0098
Regulation of mRNA polyadenylation	0.01
Regulation of cytoplasmic transport	0.01
Positive regulation of mitochondrial membrane permeability involved in apoptotic process	0.01
Regulation of TORC1 signaling	0.01
Receptor recycling	0.01
Mitotic G2/M transition checkpoint	0.01
Negative regulation of mitotic nuclear division	0.01
Amyloid-beta formation	0.01
Negative regulation of nuclear division	0.01
Endosome to lysosome transport	0.01
Cellular response to light stimulus	0.01
Proteoglycan metabolic process	0.01
Telencephalon development	0.01
Epithelial tube morphogenesis	0.01
Mitochondrial outer membrane permeabilization	0.011
Positive regulation of RNA splicing	0.011
Apoptotic cell clearance	0.011
Positive regulation of TOR signaling	0.011
Positive regulation of response to cytokine stimulus	0.011
Regulation of extrinsic apoptotic signaling pathway via death domain receptors	0.011
Regulation of pri-miRNA transcription by RNA polymerase II	0.011
Regulation of NIK/NF-kappaB signaling	0.011
Regulation of epithelial to mesenchymal transition	0.011
Establishment of RNA localization	0.011
Gastrulation	0.011
Regulation of extent of cell growth	0.011
Kidney development	0.011
Nucleoside bisphosphate metabolic process	0.011
Ribonucleoside bisphosphate metabolic process	0.011
Purine nucleoside bisphosphate metabolic process	0.011
Cellular protein complex disassembly	0.011
Gene silencing	0.011
Protein methylation	0.011
Protein alkylation	0.011
Regulation of cell division	0.011
Peptidyl-tyrosine modification	0.011
Hepaticobiliary system development	0.011
Morphogenesis of embryonic epithelium	0.011
Protein secretion	0.011
Positive regulation of mitochondrial translation	0.012
Mitochondrial calcium ion homeostasis	0.012
Microtubule nucleation	0.012
Regulation of protein export from nucleus	0.012
Cortical actin cytoskeleton organization	0.012
Inner mitochondrial membrane organization	0.012
Positive regulation of dendrite morphogenesis	0.012
Mitochondrial RNA metabolic process	0.012
Membrane biogenesis	0.012
Purine nucleoside triphosphate biosynthetic process	0.012
Collagen biosynthetic process	0.012
Positive regulation of blood vessel endothelial cell migration	0.012
Regulation of receptor-mediated endocytosis	0.012
Positive regulation of neuron death	0.012
Regulation of substrate adhesion-dependent cell spreading	0.012
Regulation of glucose transmembrane transport	0.012
ERBB signaling pathway	0.012
Regulation of peptidyl-serine phosphorylation	0.012
Cellular ketone metabolic process	0.012
Smoothened signaling pathway	0.012
Membrane lipid biosynthetic process	0.012
Gland development	0.012
Establishment of protein localization to extracellular region	0.012
Negative regulation of response to external stimulus	0.012
Integrated stress response signaling	0.013
Response to misfolded protein	0.013
Positive regulation of pri-miRNA transcription by RNA polymerase II	0.013
Negative regulation of mitochondrion organization	0.013
Vesicle transport along microtubule	0.013
Nucleoside monophosphate biosynthetic process	0.013
Vascular endothelial growth factor receptor signaling pathway	0.013
Histone H4 acetylation	0.013
Bone morphogenesis	0.013
Fatty acid oxidation	0.013
Adaptive thermogenesis	0.013
Cold-induced thermogenesis	0.013
Regulation of cold-induced thermogenesis	0.013
Response to temperature stimulus	0.013
Glial cell differentiation	0.013
Striated muscle tissue development	0.013
Response to ketone	0.013
Anaphase-promoting complex-dependent catabolic process	0.014
Cellular response to arsenic-containing substance	0.014
Protein hydroxylation	0.014
Response to nerve growth factor	0.014
Cellular response to nerve growth factor stimulus	0.014
Negative regulation of proteasomal protein catabolic process	0.014
Positive regulation of telomere maintenance	0.014
Protein destabilization	0.014
Regulation of DNA-templated transcription, elongation	0.014
Glycosaminoglycan metabolic process	0.014
Protein localization to cell surface	0.014
Transcription elongation from RNA polymerase II promoter	0.014
Regulation of peptidyl-lysine acetylation	0.014
Positive regulation of chromosome organization	0.014
Lipid storage	0.014
Movement in host environment	0.014
Protein targeting to membrane	0.014
Circadian rhythm	0.014
Stress-activated MAPK cascade	0.014
Nucleic acid transport	0.014
RNA transport	0.014
Temperature homeostasis	0.014
Multicellular organism growth	0.014
Gland morphogenesis	0.014
Wound healing	0.014
Regulation of transcription by RNA polymerase III	0.015
Regulation of necroptotic process	0.015
Vesicle cargo loading	0.015
Negative regulation of endoplasmic reticulum stress-induced intrinsic apoptotic signaling pathway	0.015
Negative regulation of proteasomal ubiquitin-dependent protein catabolic process	0.015
Histone monoubiquitination	0.015
Establishment of spindle localization	0.015
Purine ribonucleoside triphosphate biosynthetic process	0.015
Positive regulation of epithelial to mesenchymal transition	0.015
Regulation of cyclin-dependent protein kinase activity	0.015
Peptidyl-tyrosine dephosphorylation	0.015
Lipid oxidation	0.015
Positive regulation of cell-substrate adhesion	0.015
Cellular response to tumor necrosis factor	0.015
Peptidyl-tyrosine phosphorylation	0.015
Pattern recognition receptor signaling pathway	0.015
Positive regulation of MAPK cascade	0.015
Nuclear DNA replication	0.016
Protein targeting to ER	0.016
Regulation of type I interferon-mediated signaling pathway	0.016
Protein transmembrane import into intracellular organelle	0.016
Base-excision repair	0.016
Extracellular matrix assembly	0.016
Negative regulation of fat cell differentiation	0.016
Positive regulation of viral process	0.016
Positive regulation of fibroblast proliferation	0.016
Glucose transmembrane transport	0.016
Regulation of generation of precursor metabolites and energy	0.016
Regulation of phosphoprotein phosphatase activity	0.016
Negative regulation of cell adhesion	0.016
Regulation of protein secretion	0.016
Proton transmembrane transport	0.016
Regulation of stress-activated protein kinase signaling cascade	0.016
Reactive oxygen species metabolic process	0.016
Protein O-linked mannosylation	0.017
Regulation of protein sumoylation	0.017
Multivesicular body sorting pathway	0.017
Vascular endothelial growth factor signaling pathway	0.017
Regulation of cellular respiration	0.017
Regulation of cyclin-dependent protein serine/threonine kinase activity	0.017
Cellular response to ketone	0.017
Response to tumor necrosis factor	0.017
Heart morphogenesis	0.017
Negative regulation of protein serine/threonine kinase activity	0.017
Regulation of neuron apoptotic process	0.017
Establishment of mitochondrion localization	0.018
Regulation of response to reactive oxygen species	0.018
Stress granule assembly	0.018
Positive regulation of ubiquitin-protein transferase activity	0.018
Negative regulation of telomere maintenance	0.018
Synaptic vesicle transport	0.018
Regulation of protein targeting	0.018
Membrane assembly	0.018
ATP biosynthetic process	0.018
Pyrimidine-containing compound metabolic process	0.018
Histone H3 acetylation	0.018
Centrosome duplication	0.018
Positive regulation of MAP kinase activity	0.018
Carbohydrate transmembrane transport	0.018
Regulation of DNA recombination	0.018
Response to heat	0.018
Regulation of DNA binding	0.018
Regulation of smoothened signaling pathway	0.018
Hexose transmembrane transport	0.018
Response to metal ion	0.018
Notch signaling pathway	0.018
Forebrain development	0.018
Positive regulation of dendritic spine morphogenesis	0.019
Lamellipodium morphogenesis	0.019
Negative regulation of necrotic cell death	0.019
Chaperone-mediated protein complex assembly	0.019
MRNA splice site selection	0.019
Negative regulation of GTPase activity	0.019
Positive regulation of telomere maintenance via telomere lengthening	0.019
Positive regulation of telomere maintenance via telomerase	0.019
Regulation of extracellular matrix organization	0.019
Mitochondrion localization	0.019
Regulation of protein deacetylation	0.019
Regulation of translational initiation	0.019
Positive regulation of mRNA catabolic process	0.019
Polysaccharide metabolic process	0.019
Regulation of axon extension	0.019
Regulation of ossification	0.019
Regulation of carbohydrate metabolic process	0.019
Monosaccharide transmembrane transport	0.019
Glial cell development	0.019
Anterograde synaptic vesicle transport	0.02
Synaptic vesicle cytoskeletal transport	0.02
Synaptic vesicle transport along microtubule	0.02
Negative regulation of intrinsic apoptotic signaling pathway in response to DNA damage	0.02
Heme metabolic process	0.02
Heparan sulfate proteoglycan metabolic process	0.02
Regulation of extrinsic apoptotic signaling pathway in absence of ligand	0.02
Osteoblast proliferation	0.02
Regulation of transcription from RNA polymerase II promoter in response to stress	0.02
Toxin transport	0.02
Regulation of protein import	0.02
Nucleoside monophosphate metabolic process	0.02
Regulation of histone acetylation	0.02
RNA export from nucleus	0.02
Monocarboxylic acid catabolic process	0.02
Epidermal growth factor receptor signaling pathway	0.02
Positive regulation of endocytosis	0.02
Positive regulation of endothelial cell proliferation	0.02
Regulation of cell junction assembly	0.02
Respiratory tube development	0.02
Hexose metabolic process	0.02
Regulation of peptidase activity	0.02
Cytoplasmic translational initiation	0.021
Thioester biosynthetic process	0.021
Acyl-CoA biosynthetic process	0.021
Response to X-ray	0.021
Response to fluid shear stress	0.021
Central nervous system neuron axonogenesis	0.021
Modulation of process of other organism involved in symbiotic interaction	0.021
Alternative mRNA splicing, via spliceosome	0.021
Dendritic spine development	0.021
Response to activity	0.021
Glycolipid metabolic process	0.021
Dendrite morphogenesis	0.021
Circulatory system process	0.021
Eye development	0.021
Glial cell apoptotic process	0.022
Positive regulation of transcription from RNA polymerase II promoter involved in cellular response to chemical stimulus	0.022
Water-soluble vitamin metabolic process	0.022
Amyloid fibril formation	0.022
Tricarboxylic acid cycle	0.022
Intracellular pH reduction	0.022
Positive regulation of extracellular matrix organization	0.022
Establishment of mitotic spindle orientation	0.022
Schwann cell differentiation	0.022
Establishment or maintenance of epithelial cell apical/basal polarity	0.022
Positive regulation of cytokine-mediated signaling pathway	0.022
Positive regulation of actin filament bundle assembly	0.022
Morphogenesis of a polarized epithelium	0.022
MRNA destabilization	0.022
Protein autoubiquitination	0.022
Regulation of pattern recognition receptor signaling pathway	0.022
Alcohol biosynthetic process	0.022
Mucopolysaccharide metabolic process	0.022
Regulation of response to wounding	0.022
Regulation of osteoblast differentiation	0.022
RNA destabilization	0.022
Steroid hormone mediated signaling pathway	0.022
Regulation of peptidyl-tyrosine phosphorylation	0.022
Regulation of hemopoiesis	0.022
Aspartate family amino acid biosynthetic process	0.023
Mitochondrion morphogenesis	0.023
Protein insertion into ER membrane	0.023
Positive regulation of cell-substrate junction organization	0.023
SnRNA metabolic process	0.023
Negative regulation of chromosome segregation	0.023
Negative regulation of metaphase/anaphase transition of cell cycle	0.023
Negative regulation of chromosome separation	0.023
Negative regulation of smooth muscle cell proliferation	0.023
DNA-templated transcription, initiation	0.023
Protein depolymerization	0.023
Skeletal system morphogenesis	0.023
Cellular response to inorganic substance	0.023
Inflammatory response	0.023
Fatty acid metabolic process	0.023
Mitochondrial genome maintenance	0.024
Chaperone-mediated protein folding	0.024
Alpha-amino acid biosynthetic process	0.024
Regulation of glucose import	0.024
Cell migration involved in sprouting angiogenesis	0.024
Regulation of type I interferon production	0.024
Type I interferon production	0.024
Positive regulation of epithelial cell proliferation	0.024
Sphingolipid metabolic process	0.024
Regulation of stress-activated MAPK cascade	0.024
Respiratory chain complex IV assembly	0.025
Establishment of planar polarity of embryonic epithelium	0.025
Purine nucleoside monophosphate biosynthetic process	0.025
Purine ribonucleoside monophosphate biosynthetic process	0.025
Regulation of autophagy of mitochondrion	0.025
Retrograde protein transport, ER to cytosol	0.025
Endoplasmic reticulum to cytosol transport	0.025
Nucleobase metabolic process	0.025
Ribonucleoside monophosphate biosynthetic process	0.025
Amyloid-beta clearance	0.025
Autophagosome maturation	0.025
Negative regulation of cold-induced thermogenesis	0.025
Regulation of ATPase activity	0.025
Positive regulation of stress fiber assembly	0.025
Glycolipid biosynthetic process	0.025
Regulation of alternative mRNA splicing, via spliceosome	0.025
Interferon-beta production	0.025
Regulation of interferon-beta production	0.025
Regulation of cellular response to insulin stimulus	0.025
Lamellipodium assembly	0.025
Regulation of lamellipodium organization	0.025
Regulation of fatty acid metabolic process	0.025
Artery development	0.025
Cellular lipid catabolic process	0.025
Lung development	0.025
Response to carbohydrate	0.025
Regulation of hippo signaling	0.026
DNA dealkylation	0.026
Positive regulation of protein deacetylation	0.026
Mitochondrial fusion	0.026
Negative regulation of sister chromatid segregation	0.026
Negative regulation of mitotic sister chromatid segregation	0.026
Negative regulation of mitotic metaphase/anaphase transition	0.026
Negative regulation of mitotic sister chromatid separation	0.026
Protein localization to lysosome	0.026
Negative regulation of microtubule polymerization or depolymerization	0.026
Cellular amino acid biosynthetic process	0.026
Glycosyl compound metabolic process	0.026
Response to glucocorticoid	0.026
Regulation of transmembrane receptor protein serine/threonine kinase signaling pathway	0.026
DNA conformation change	0.026
Regulation of leukocyte migration	0.026
Cell junction assembly	0.026
Long-chain fatty acid import into cell	0.027
Lipid import into cell	0.027
Phagosome maturation	0.027
Mitotic G2 DNA damage checkpoint signaling	0.027
Spindle checkpoint signaling	0.027
Anterograde axonal transport	0.027
Positive regulation of smooth muscle cell proliferation	0.027
Protein K63-linked ubiquitination	0.027
Synaptic vesicle recycling	0.027
Regulation of dendrite development	0.027
Glycogen metabolic process	0.027
Cellular glucan metabolic process	0.027
Glucan metabolic process	0.027
Hematopoietic progenitor cell differentiation	0.027
Visual system development	0.027
Organic acid biosynthetic process	0.027
Carboxylic acid biosynthetic process	0.027
Cellular cation homeostasis	0.027
RNA 5 -end processing	0.028
Regulation of ERAD pathway	0.028
Nuclear-transcribed mRNA poly(A) tail shortening	0.028
Endochondral ossification	0.028
Replacement ossification	0.028
Mitophagy	0.028
Regulation of phospholipid metabolic process	0.028
Purine ribonucleoside monophosphate metabolic process	0.028
Positive regulation of protein import	0.028
Positive regulation of substrate adhesion-dependent cell spreading	0.028
Heterochromatin organization	0.028
Liposaccharide metabolic process	0.028
Negative regulation of transforming growth factor beta receptor signaling pathway	0.028
Carbohydrate transport	0.028
Epithelial cell apoptotic process	0.028
Response to monosaccharide	0.028
Small molecule catabolic process	0.028
Negative regulation of neuron death	0.028
Chondrocyte development	0.029
NcRNA 3 -end processing	0.029
Regulation of amyloid-beta formation	0.029
Regulation of telomerase activity	0.029
Negative regulation of cell-substrate adhesion	0.029
Ribonucleoside monophosphate metabolic process	0.029
Regulation of protein import into nucleus	0.029
Synaptic vesicle localization	0.029
Positive regulation of cell-matrix adhesion	0.029
Regulation of stem cell differentiation	0.029
Positive regulation of peptidase activity	0.029
Negative regulation of immune system process	0.029
Heme biosynthetic process	0.03
Peptidyl-asparagine modification	0.03
Phosphatidylcholine biosynthetic process	0.03
Energy coupled proton transport, down electrochemical gradient	0.03
ATP synthesis coupled proton transport	0.03
Negative regulation of stem cell differentiation	0.03
Negative regulation of protein localization to cell periphery	0.03
Cellular response to amyloid-beta	0.03
Establishment of spindle orientation	0.03
Cellular pigmentation	0.03
Ruffle organization	0.03
Regulation of postsynapse organization	0.03
Endothelium development	0.03
Cellular modified amino acid metabolic process	0.03
Regulation of wound healing	0.03
Positive regulation of leukocyte migration	0.03
Dosage compensation by inactivation of X chromosome	0.031
Positive regulation of protein targeting to membrane	0.031
Ruffle assembly	0.031
Intrinsic apoptotic signaling pathway in response to DNA damage by p53 class mediator	0.031
Cytoplasmic pattern recognition receptor signaling pathway	0.031
Organelle localization by membrane tethering	0.031
Negative regulation of response to cytokine stimulus	0.031
Ribonucleoprotein complex export from nucleus	0.031
Regulation of protein depolymerization	0.031
DNA modification	0.031
Regulation of muscle cell differentiation	0.031
Organophosphate catabolic process	0.031
Negative regulation of developmental growth	0.031
Positive regulation of cytokine production	0.031
Response to lipopolysaccharide	0.031
Cellular ion homeostasis	0.031
Response to hepatocyte growth factor	0.032
Fibroblast apoptotic process	0.032
Negative regulation of organelle assembly	0.032
Positive regulation of glucose transmembrane transport	0.032
Positive regulation of axon extension	0.032
Columnar/cuboidal epithelial cell development	0.032
RNA phosphodiester bond hydrolysis, endonucleolytic	0.032
Response to type I interferon	0.032
Vesicle cytoskeletal trafficking	0.032
Regulation of intracellular steroid hormone receptor signaling pathway	0.032
Double-strand break repair via homologous recombination	0.032
Response to hexose	0.032
Viral genome replication	0.032
Mammary gland development	0.032
Respiratory system development	0.032
Cardiac muscle tissue development	0.032
Regulation of cell-cell adhesion	0.032
DNA replication initiation	0.033
Centriole replication	0.033
Carbohydrate derivative transport	0.033
Negative regulation of MAPK cascade	0.033
Regulation of establishment of protein localization to mitochondrion	0.034
Myelin assembly	0.034
Positive regulation of wound healing	0.034
Fatty acid biosynthetic process	0.034
Intracellular steroid hormone receptor signaling pathway	0.034
Carbohydrate biosynthetic process	0.034
Positive regulation of response to external stimulus	0.034
Cilium organization	0.034
Pigment granule organization	0.035
DNA catabolic process, endonucleolytic	0.035
Establishment of mitochondrion localization, microtubule-mediated	0.035
Mitochondrion transport along microtubule	0.035
Pteridine-containing compound metabolic process	0.035
Mitotic spindle assembly checkpoint signaling	0.035
Spindle assembly checkpoint signaling	0.035
Mitotic spindle checkpoint signaling	0.035
GPI anchor metabolic process	0.035
Negative regulation of DNA biosynthetic process	0.035
Transforming growth factor beta production	0.035
Glial cell proliferation	0.035
Negative regulation of protein kinase B signaling	0.035
Regulation of DNA-templated transcription in response to stress	0.035
Body morphogenesis	0.035
Pigment metabolic process	0.035
Animal organ regeneration	0.035
Regulation of muscle adaptation	0.035
Regulation of viral process	0.035
Sensory system development	0.035
Defense response to virus	0.035
Defense response to symbiont	0.035
Regulation of endopeptidase activity	0.035
Developmental maturation	0.035
Endochondral bone growth	0.036
Cellular response to interleukin-4	0.036
Collateral sprouting	0.036
Establishment of epithelial cell polarity	0.036
Negative regulation of cytokine-mediated signaling pathway	0.036
Post-transcriptional gene silencing by RNA	0.036
Cellular iron ion homeostasis	0.036
Recombinational repair	0.036
Establishment of planar polarity involved in neural tube closure	0.037
Establishment of protein localization to chromosome	0.037
Pyrimidine-containing compound biosynthetic process	0.037
GPI anchor biosynthetic process	0.037
Regulation of DNA damage response, signal transduction by p53 class mediator	0.037
Regulation of microtubule polymerization	0.037
Peptidyl-proline modification	0.037
Gene silencing by miRNA	0.037
Nucleoside phosphate catabolic process	0.037
Negative regulation of NF-kappaB transcription factor activity	0.037
Nuclear membrane organization	0.038
Protein localization to microtubule	0.038
Negative regulation of protein localization to plasma membrane	0.038
Regulation of cell cycle checkpoint	0.038
Nucleoside metabolic process	0.038
Positive regulation of fat cell differentiation	0.038
Regulation of erythrocyte differentiation	0.038
Muscle cell apoptotic process	0.038
Face development	0.038
Acyl-CoA metabolic process	0.038
Thioester metabolic process	0.038
Negative regulation of protein-containing complex disassembly	0.038
Posttranscriptional gene silencing	0.038
Response to osmotic stress	0.038
Response to corticosteroid	0.038
Regulation of endothelial cell proliferation	0.038
Tumor necrosis factor production	0.038
Regulation of tumor necrosis factor production	0.038
Cilium assembly	0.038
Response to molecule of bacterial origin	0.038
Negative regulation of release of cytochrome c from mitochondria	0.039
Negative regulation of smooth muscle cell migration	0.039
Negative regulation of RNA splicing	0.039
Regulation of osteoblast proliferation	0.039
Type I interferon signaling pathway	0.039
Regulation of lipid storage	0.039
Establishment or maintenance of apical/basal cell polarity	0.039
Establishment or maintenance of bipolar cell polarity	0.039
Regulation of centrosome cycle	0.039
Cellular response to heat	0.039
Mammary gland epithelium development	0.039
Neuron projection organization	0.039
Response to glucose	0.039
Cellular response to biotic stimulus	0.039
Leukocyte differentiation	0.039
TRNA wobble base modification	0.04
Phosphatidylinositol dephosphorylation	0.04
Response to interleukin-4	0.04
Nuclear envelope organization	0.04
Cellular response to type I interferon	0.04
Ribonucleoprotein complex localization	0.04
Cellular polysaccharide metabolic process	0.04
Positive regulation of protein kinase B signaling	0.04
Tissue remodeling	0.04
Response to hyperoxia	0.041
Neurotrophin TRK receptor signaling pathway	0.041
Cell death in response to hydrogen peroxide	0.041
Regulation of intracellular pH	0.041
Artery morphogenesis	0.041
Response to mechanical stimulus	0.041
Organ growth	0.041
DNA demethylation	0.042
Histone H2A monoubiquitination	0.042
Cytoplasmic sequestering of protein	0.042
Neurotrophin signaling pathway	0.042
Positive regulation of protein import into nucleus	0.042
Regulation of histone deacetylation	0.042
Purine nucleoside monophosphate metabolic process	0.042
Cellular response to osmotic stress	0.042
MRNA export from nucleus	0.042
MRNA-containing ribonucleoprotein complex export from nucleus	0.042
Negative regulation of protein polymerization	0.042
Actin nucleation	0.042
Response to axon injury	0.042
Aminoglycan metabolic process	0.042
Energy reserve metabolic process	0.042
Transcription initiation from RNA polymerase II promoter	0.042
Regulation of response to oxidative stress	0.042
Positive regulation of tumor necrosis factor production	0.042
Tumor necrosis factor superfamily cytokine production	0.042
Regulation of tumor necrosis factor superfamily cytokine production	0.042
Sterol metabolic process	0.042
Pyrimidine nucleotide biosynthetic process	0.043
Peroxisome organization	0.043
Regulation of transforming growth factor beta production	0.043
Arp2/3 complex-mediated actin nucleation	0.043
Regulation of ERBB signaling pathway	0.043
Maintenance of cell number	0.043
Organic acid catabolic process	0.043
Pallium development	0.043
Regulation of glucose metabolic process	0.043
Metal ion homeostasis	0.043
Negative regulation of vascular associated smooth muscle cell proliferation	0.044
Positive regulation of transcription from RNA polymerase II promoter in response to stress	0.044
Dendritic spine organization	0.044
Endothelial cell proliferation	0.044
Tetrahydrofolate metabolic process	0.045
Protein neddylation	0.045
Folic acid-containing compound metabolic process	0.045
Positive regulation of focal adhesion assembly	0.045
Virion assembly	0.045
Bone growth	0.045
Positive regulation of lamellipodium organization	0.045
Response to ischemia	0.045
Viral gene expression	0.045
Response to estradiol	0.045
Regulation of bone mineralization	0.045
Gene silencing by RNA	0.045
Striated muscle cell differentiation	0.045
Positive regulation of extrinsic apoptotic signaling pathway via death domain receptors	0.046
Nuclear-transcribed mRNA catabolic process, nonsense-mediated decay	0.046
Negative regulation of protein processing	0.046
Negative regulation of protein maturation	0.046
Secretory granule organization	0.046
Skeletal muscle tissue regeneration	0.046
Negative regulation of intracellular transport	0.046
Nucleotide-excision repair	0.046
Regulation of cartilage development	0.046
Regulation of myeloid cell differentiation	0.046
DNA recombination	0.046
Carboxylic acid catabolic process	0.046
Response to UV-C	0.047
Regulation of oxidative stress-induced intrinsic apoptotic signaling pathway	0.047
Nuclear migration	0.047
Regulation of chromatin binding	0.047
Positive regulation of DNA-templated transcription, elongation	0.047
Aspartate family amino acid metabolic process	0.047
Phospholipid dephosphorylation	0.047
Membrane protein proteolysis	0.047
Negative regulation of Ras protein signal transduction	0.047
Carbohydrate homeostasis	0.047
Alcohol metabolic process	0.047
Regulation of intrinsic apoptotic signaling pathway by p53 class mediator	0.048
Negative chemotaxis	0.048
Regulation of insulin receptor signaling pathway	0.048
Somatic diversification of immunoglobulins	0.048
Production of miRNAs involved in gene silencing by miRNA	0.048
Regulation of oxidative stress-induced cell death	0.048
DsRNA processing	0.048
Production of small RNA involved in gene silencing by RNA	0.048
Positive regulation of response to wounding	0.048
Negative regulation of epithelial cell proliferation	0.048
Carbohydrate derivative catabolic process	0.048
Positive regulation of tumor necrosis factor superfamily cytokine production	0.048
Histone methylation	0.048
Positive regulation of NIK/NF-kappaB signaling	0.049
Positive regulation of peptidyl-serine phosphorylation	0.049
Sphingomyelin metabolic process	0.05
Regulation of synaptic vesicle recycling	0.05
Regulation of Rac protein signal transduction	0.05
Monosaccharide catabolic process	0.05
Cellular modified amino acid biosynthetic process	0.05
Pyrimidine nucleotide metabolic process	0.05
Aorta development	0.05
Positive regulation of histone modification	0.05
Regulation of circadian rhythm	0.05
Multicellular organismal homeostasis	0.05
Protein complex oligomerization	0.05
Glucose homeostasis	0.05
Lipid localization	0.05
Tail-anchored membrane protein insertion into ER membrane	0.051
Modification of postsynaptic structure	0.051
Placenta blood vessel development	0.051
RNA phosphodiester bond hydrolysis, exonucleolytic	0.051
Phosphatidylinositol phosphate biosynthetic process	0.051
Cellular response to virus	0.051
Negative regulation of small GTPase mediated signal transduction	0.051
Non-motile cilium assembly	0.051
Regulation of gene silencing	0.051
Hormone-mediated signaling pathway	0.051
Regulation of chemotaxis	0.051
Mitochondrial cytochrome c oxidase assembly	0.052
Response to increased oxygen levels	0.052
Cellular response to epidermal growth factor stimulus	0.052
Cardiac septum morphogenesis	0.052
Leukocyte homeostasis	0.052
Molting cycle process	0.052
Hair cycle process	0.052
Negative regulation of defense response	0.052
ERK1 and ERK2 cascade	0.052
Rab protein signal transduction	0.053
Negative regulation of telomere maintenance via telomerase	0.053
Negative regulation of amyloid precursor protein catabolic process	0.053
Muscle cell cellular homeostasis	0.053
Bone maturation	0.053
Positive regulation of erythrocyte differentiation	0.053
de novo protein folding	0.053
Regulation of viral release from host cell	0.053
Secondary alcohol metabolic process	0.053
Positive regulation of stress-activated protein kinase signaling cascade	0.053
Stem cell population maintenance	0.053
Negative regulation of cytokine production	0.053
Camera-type eye development	0.053
Response to alcohol	0.053
Ubiquinone biosynthetic process	0.054
Quinone biosynthetic process	0.054
Protein targeting to peroxisome	0.054
Protein localization to peroxisome	0.054
Establishment of protein localization to peroxisome	0.054
Establishment or maintenance of monopolar cell polarity	0.054
Establishment of monopolar cell polarity	0.054
Collagen catabolic process	0.054
Regulation of transcription elongation from RNA polymerase II promoter	0.054
Nucleus localization	0.054
Negative regulation of cellular response to insulin stimulus	0.054
B cell homeostasis	0.054
Aorta morphogenesis	0.054
Regulation of microtubule depolymerization	0.054
Tumor necrosis factor-mediated signaling pathway	0.054
Leukocyte apoptotic process	0.054
Negative regulation of RNA catabolic process	0.054
Actin filament-based movement	0.054
Positive regulation of lipid metabolic process	0.054
Negative regulation of transmembrane receptor protein serine/threonine kinase signaling pathway	0.054
Blood circulation	0.054
Muscle system process	0.054
Cellular metal ion homeostasis	0.054
Mitochondrial transcription	0.055
Centriole assembly	0.055
Negative regulation of lipid localization	0.055
Response to amyloid-beta	0.055
Regulation of cellular response to oxidative stress	0.055
Somatic diversification of immune receptors	0.055
Negative regulation of transmembrane transport	0.055
JNK cascade	0.055
Cerebral cortex development	0.055
Import into cell	0.055
Regulation of receptor recycling	0.056
Positive regulation of ATPase activity	0.056
Pigment biosynthetic process	0.056
Positive regulation of viral genome replication	0.057
Regulation of tumor necrosis factor-mediated signaling pathway	0.057
Tetrapyrrole metabolic process	0.057
Regulation of muscle cell apoptotic process	0.057
Execution phase of apoptosis	0.057
Smooth muscle cell differentiation	0.057
Polysaccharide biosynthetic process	0.057
Cellular response to alcohol	0.057
Cholesterol metabolic process	0.057
Mitochondrial calcium ion transmembrane transport	0.058
Schwann cell development	0.058
Regulation of protein maturation	0.058
Negative regulation of protein depolymerization	0.058
Positive regulation of inflammatory response	0.058
Positive regulation of endopeptidase activity	0.058
Chemotaxis	0.058
Regulation of fibroblast apoptotic process	0.059
Chondroitin sulfate proteoglycan biosynthetic process	0.059
Negative regulation of signal transduction by p53 class mediator	0.059
Regulation of neuron projection regeneration	0.059
Regulation of DNA-templated transcription, initiation	0.059
Regulation of protein processing	0.059
Cardiac chamber morphogenesis	0.059
Protein targeting to lysosome	0.06
Positive regulation of peptidyl-threonine phosphorylation	0.06
Smooth muscle tissue development	0.06
Positive regulation of mRNA processing	0.06
Positive regulation of glucose import	0.06
Regulation of macrophage activation	0.06
Regulation of collagen metabolic process	0.06
Phosphatidylcholine metabolic process	0.06
Embryo implantation	0.06
Positive regulation of peptidyl-tyrosine phosphorylation	0.06
Regulation of hydrogen peroxide-induced cell death	0.061
Intracellular sterol transport	0.061
Intracellular cholesterol transport	0.061
Purine nucleoside metabolic process	0.061
Vascular associated smooth muscle cell migration	0.061
Cardiac epithelial to mesenchymal transition	0.061
RNA stabilization	0.061
Outflow tract morphogenesis	0.061
Activation of cysteine-type endopeptidase activity involved in apoptotic process	0.061
Skin development	0.061
Organic acid transmembrane transport	0.061
Negative regulation of organic acid transport	0.062
Positive regulation of protein export from nucleus	0.062
Regulation of ubiquitin protein ligase activity	0.062
Porphyrin-containing compound biosynthetic process	0.062
Regulation of cholesterol metabolic process	0.062
Pigment cell differentiation	0.062
Regulation of peptidyl-threonine phosphorylation	0.062
Regulation of granulocyte chemotaxis	0.062
Regulation of lipase activity	0.062
Appendage development	0.062
Limb development	0.062
Carboxylic acid transmembrane transport	0.062
Heart process	0.062
Negative regulation of intrinsic apoptotic signaling pathway by p53 class mediator	0.063
Myeloid leukocyte cytokine production	0.063
Nucleotide catabolic process	0.063
Regulation of cellular pH	0.063
Tissue regeneration	0.063
Hippocampus development	0.063
Negative regulation of angiogenesis	0.063
Cleavage involved in rRNA processing	0.064
Negative regulation of insulin receptor signaling pathway	0.064
Positive regulation of telomerase activity	0.064
Macrophage activation	0.064
Negative regulation of Wnt signaling pathway	0.064
Post-translational protein modification	0.065
Thymocyte apoptotic process	0.066
Negative regulation of microtubule depolymerization	0.066
Viral release from host cell	0.066
Exit from host	0.066
Exit from host cell	0.066
Regulation of protein autophosphorylation	0.066
Regulation of actin cytoskeleton reorganization	0.066
Negative regulation of epithelial cell migration	0.066
SCF-dependent proteasomal ubiquitin-dependent protein catabolic process	0.066
Muscle adaptation	0.066
Negative regulation of blood vessel morphogenesis	0.066
Cellular response to metal ion	0.066
Regulation of response to biotic stimulus	0.066
Negative regulation of telomere maintenance via telomere lengthening	0.067
Regulation of platelet-derived growth factor receptor signaling pathway	0.067
Carbohydrate phosphorylation	0.067
RRNA modification	0.067
Megakaryocyte differentiation	0.067
NcRNA transcription	0.067
Regulation of protein polyubiquitination	0.068
Negative regulation of DNA binding	0.068
Demethylation	0.068
Lymphocyte apoptotic process	0.068
Skin epidermis development	0.068
MRNA transport	0.068
Positive regulation of stress-activated MAPK cascade	0.068
Activation of protein kinase activity	0.068
Hair follicle development	0.068
Cardiac ventricle development	0.068
Cellular response to lipopolysaccharide	0.068
Stem cell differentiation	0.068
Regulation of transmembrane transport	0.068
Magnesium ion transport	0.069
Negative regulation of nucleocytoplasmic transport	0.069
Phosphatidic acid biosynthetic process	0.069
Positive regulation of vascular associated smooth muscle cell proliferation	0.069
Negative regulation of intracellular steroid hormone receptor signaling pathway	0.069
Regulation of centrosome duplication	0.069
Mammary gland morphogenesis	0.069
Negative regulation of vasculature development	0.069
Regulation of JNK cascade	0.069
Regulation of muscle system process	0.069
Import across plasma membrane	0.069
Negative regulation of phagocytosis	0.07
Regulation of membrane protein ectodomain proteolysis	0.07
Positive regulation of histone deacetylation	0.07
Positive regulation of macrophage migration	0.07
de novo posttranslational protein folding	0.07
Negative regulation of cell-matrix adhesion	0.07
Neutral lipid biosynthetic process	0.07
Acylglycerol biosynthetic process	0.07
DNA-dependent DNA replication maintenance of fidelity	0.07
Heterochromatin assembly	0.07
Response to epidermal growth factor	0.07
Regulation of double-strand break repair via homologous recombination	0.07
Formation of primary germ layer	0.07
Negative regulation of neuron apoptotic process	0.07
Taxis	0.07
Response to platelet-derived growth factor	0.071
Negative regulation of fibroblast proliferation	0.071
Cytoplasmic pattern recognition receptor signaling pathway in response to virus	0.071
Regulation of transcription initiation from RNA polymerase II promoter	0.071
Response to copper ion	0.071
Triglyceride biosynthetic process	0.071
Response to antibiotic	0.071
Regulation of epidermal growth factor receptor signaling pathway	0.071
Regulation of synapse structure or activity	0.071
Negative regulation of immune response	0.071
Monocarboxylic acid metabolic process	0.071
Response to caffeine	0.072
Ossification involved in bone maturation	0.072
Positive regulation of posttranscriptional gene silencing	0.072
Negative regulation of endothelial cell migration	0.072
Regulation of dendrite morphogenesis	0.072
Toll-like receptor signaling pathway	0.072
Positive regulation of secretion by cell	0.072
Dendritic spine maintenance	0.073
Regulation of aerobic respiration	0.073
Glandular epithelial cell development	0.073
Positive regulation of interferon-beta production	0.073
Response to cold	0.073
Establishment of protein localization to vacuole	0.073
Neural tube patterning	0.073
Neuron projection regeneration	0.073
Positive regulation of neuron apoptotic process	0.073
Translational elongation	0.073
Ventricular septum development	0.073
Response to interleukin-1	0.073
Negative regulation of cell development	0.073
Integrin-mediated signaling pathway	0.073
Morphogenesis of a branching structure	0.073
Placenta development	0.073
Cellular component disassembly involved in execution phase of apoptosis	0.074
Purine ribonucleotide catabolic process	0.074
Regulation of fatty acid biosynthetic process	0.074
Intracellular estrogen receptor signaling pathway	0.074
Positive regulation of lipid biosynthetic process	0.074
Negative regulation of dephosphorylation	0.074
Negative regulation of establishment of protein localization	0.074
Response to purine-containing compound	0.074
Morphogenesis of a branching epithelium	0.074
Regulation of synapse organization	0.074
Regulation of phospholipid biosynthetic process	0.075
Peroxisomal transport	0.075
Plasma membrane tubulation	0.075
Regulation of cardiac muscle cell action potential	0.075
Negative regulation of DNA replication	0.075
Regulation of smooth muscle cell differentiation	0.075
Synaptic vesicle endocytosis	0.075
Presynaptic endocytosis	0.075
Trabecula morphogenesis	0.075
Regulation of cilium assembly	0.075
Regulation of multicellular organism growth	0.075
Regulation of viral life cycle	0.075
Cellular glucose homeostasis	0.075
Positive regulation of signal transduction by p53 class mediator	0.076
Bone mineralization	0.076
Lipid homeostasis	0.076
Nuclear body organization	0.077
Protein import into mitochondrial matrix	0.077
Regulation of mammary gland epithelial cell proliferation	0.077
RRNA methylation	0.077
Entrainment of circadian clock by photoperiod	0.077
Face morphogenesis	0.077
Heart valve development	0.077
Regulation of defense response to virus	0.077
Cellular response to interferon-gamma	0.077
Regulation of mitochondrial outer membrane permeabilization involved in apoptotic signaling pathway	0.078
Heparan sulfate proteoglycan biosynthetic process	0.078
CGMP-mediated signaling	0.078
Negative regulation of defense response to virus	0.078
Cellular metabolic compound salvage	0.078
DNA catabolic process	0.078
Basement membrane organization	0.078
Positive regulation of mitotic nuclear division	0.078
Histone phosphorylation	0.078
Microtubule depolymerization	0.078
Positive regulation of dendritic spine development	0.078
Positive regulation of reactive oxygen species metabolic process	0.078
Endothelial cell apoptotic process	0.078
Lymphocyte homeostasis	0.078
Immunoglobulin production	0.078
Regulation of ATP metabolic process	0.078
Production of molecular mediator of immune response	0.078
Regulation of mononuclear cell migration	0.078
Regulation of cellular carbohydrate metabolic process	0.078
Kinetochore organization	0.079
Regulation of vascular associated smooth muscle cell migration	0.079
Mammary gland epithelial cell proliferation	0.079
Positive regulation of smooth muscle cell migration	0.079
Head morphogenesis	0.079
Regulation of phospholipase activity	0.079
T cell apoptotic process	0.079
Sphingolipid biosynthetic process	0.079
T cell proliferation	0.079
Regulation of secretion by cell	0.079
Protein palmitoylation	0.08
Membrane protein ectodomain proteolysis	0.08
Purine nucleotide catabolic process	0.08
Endothelial cell differentiation	0.08
Post-embryonic development	0.08
Roof of mouth development	0.08
Myeloid leukocyte migration	0.08
Cellular response to fluid shear stress	0.081
Positive regulation of stem cell proliferation	0.081
Receptor catabolic process	0.081
NcRNA catabolic process	0.081
Amino sugar metabolic process	0.081
Regulation of fatty acid oxidation	0.081
Protein peptidyl-prolyl isomerization	0.081
Morphogenesis of an epithelial sheet	0.081
Negative regulation of myeloid cell differentiation	0.081
Intracellular lipid transport	0.082
Regulation of chromatin organization	0.082
Coronary vasculature development	0.082
Somatic recombination of immunoglobulin gene segments	0.082
Cellular oxidant detoxification	0.082
Entry into host	0.082
Cellular response to molecule of bacterial origin	0.082
Positive regulation of amyloid-beta formation	0.083
Ventricular septum morphogenesis	0.083
Salivary gland morphogenesis	0.083
Regulation of macrophage migration	0.083
Negative regulation of cellular response to growth factor stimulus	0.083
Positive regulation of mitochondrial fission	0.084
Histone deubiquitination	0.084
Polarized epithelial cell differentiation	0.084
Negative regulation of lipid transport	0.084
Photoperiodism	0.084
Regulation of intracellular estrogen receptor signaling pathway	0.084
Sterol biosynthetic process	0.084
Glial cell migration	0.084
Regulation of dendritic spine development	0.084
Regulation of biomineral tissue development	0.084
Microtubule-based movement	0.084
Cellular response to platelet-derived growth factor stimulus	0.085
Regulation of endothelial cell differentiation	0.085
Neuromuscular junction development	0.085
Positive regulation of receptor-mediated endocytosis	0.085
Dendritic spine morphogenesis	0.085
Regulation of secretion	0.085
Podosome assembly	0.086
Regulation of Arp2/3 complex-mediated actin nucleation	0.086
Middle ear morphogenesis	0.086
Cell volume homeostasis	0.086
Spliceosomal snRNP assembly	0.086
Positive regulation of lipase activity	0.086
Monocarboxylic acid biosynthetic process	0.086
Vesicle-mediated transport in synapse	0.086
Pyrimidine nucleoside triphosphate biosynthetic process	0.087
Interleukin-1-mediated signaling pathway	0.087
Response to lipoprotein particle	0.087
Lymph vessel morphogenesis	0.087
Regulation of double-strand break repair via nonhomologous end joining	0.087
Regulation of dendritic spine morphogenesis	0.087
Regulation of lamellipodium assembly	0.087
Regulation of biomineralization	0.087
Transition metal ion transport	0.087
T cell activation	0.087
Negative regulation of cartilage development	0.088
Establishment of apical/basal cell polarity	0.088
Negative regulation of response to biotic stimulus	0.088
Hexose catabolic process	0.089
Positive regulation of amyloid precursor protein catabolic process	0.089
Regulation of astrocyte differentiation	0.089
Negative regulation of blood vessel endothelial cell migration	0.089
Positive regulation of protein-containing complex disassembly	0.089
Semi-lunar valve development	0.089
Regulation of myelination	0.089
Adipose tissue development	0.089
Regulation of cell aging	0.089
Synapse organization	0.089
P-body assembly	0.09
Wound healing, spreading of epidermal cells	0.09
Cellular response to lipoprotein particle stimulus	0.09
Regulation of ERK1 and ERK2 cascade	0.09
Regulation of receptor localization to synapse	0.091
Mitochondrial ATP synthesis coupled proton transport	0.091
Apoptotic nuclear changes	0.091
Positive regulation of gene silencing by miRNA	0.091
Negative regulation of protein localization to nucleus	0.091
Purine-containing compound catabolic process	0.091
Brown fat cell differentiation	0.091
Response to nutrient	0.091
Pulmonary valve development	0.092
Lymph vessel development	0.092
Zinc ion homeostasis	0.092
Heart valve morphogenesis	0.092
Viral entry into host cell	0.092
Negative regulation of protein transport	0.092
Osteoblast development	0.093
Negative regulation of type I interferon-mediated signaling pathway	0.093
Regulation of centriole replication	0.093
Protein heterooligomerization	0.093
Establishment of epithelial cell apical/basal polarity	0.093
Purine ribonucleoside metabolic process	0.093
Regulation of establishment or maintenance of cell polarity	0.093
Phosphatidic acid metabolic process	0.093
Chaperone cofactor-dependent protein refolding	0.093
Negative regulation of cyclin-dependent protein kinase activity	0.093
Cellular zinc ion homeostasis	0.093
Central nervous system projection neuron axonogenesis	0.093
Bone cell development	0.093
Establishment of endothelial barrier	0.093
Positive regulation of muscle cell differentiation	0.093
Regulation of toll-like receptor signaling pathway	0.093
Positive regulation of chemotaxis	0.093
Cellular response to monosaccharide stimulus	0.093
Cellular response to hexose stimulus	0.093
Glucose metabolic process	0.093
Mononuclear cell differentiation	0.093
Regulation of collagen biosynthetic process	0.094
Positive regulation of JNK cascade	0.094
Histone lysine methylation	0.094
Lymphocyte differentiation	0.094
Negative regulation of gene expression, epigenetic	0.095
Regulation of lipid localization	0.095
Regulation of fatty acid transport	0.096
Deoxyribonucleotide metabolic process	0.096
Positive regulation of protein dephosphorylation	0.096
Regulation of embryonic development	0.096
Lysosome localization	0.096
Pigmentation	0.096
Cell activation involved in immune response	0.096
Cellular response to glucose stimulus	0.097
BMP signaling pathway	0.097
Growth plate cartilage development	0.098
Peptidyl-L-cysteine S-palmitoylation	0.098
Peptidyl-S-diacylglycerol-L-cysteine biosynthetic process from peptidyl-cysteine	0.098
SnRNA processing	0.098
B cell apoptotic process	0.098
Multicellular organism aging	0.098
Negative regulation of lipid biosynthetic process	0.098
Cellular response to glucocorticoid stimulus	0.098
Positive regulation of type I interferon production	0.098
Bone remodeling	0.098
Leukocyte proliferation	0.098
Regulation of nuclear-transcribed mRNA catabolic process, deadenylation-dependent decay	0.099
Response to muscle stretch	0.099
Regulation of protein targeting to membrane	0.099
Negative regulation of organ growth	0.099
Lens fiber cell differentiation	0.099
Telomere capping	0.099
Ubiquinone metabolic process	0.1
Positive regulation of lamellipodium assembly	0.1
Regulation of organic acid transport	0.1
Tetrapyrrole biosynthetic process	0.1
Maturation of 5.8S rRNA	0.1
Positive regulation of cell cycle G2/M phase transition	0.1
Positive regulation of release of cytochrome c from mitochondria	0.1
Diol metabolic process	0.1
Substrate-dependent cell migration	0.1
Dorsal/ventral neural tube patterning	0.1
Positive regulation of osteoblast differentiation	0.1
Regulation of cell migration involved in sprouting angiogenesis	0.1
Entrainment of circadian clock	0.1
Response to progesterone	0.1
Epithelial cell development	0.1
Regulation of chondrocyte differentiation	0.1
Modulation of process of other organism	0.1
Positive regulation of small molecule metabolic process	0.1
Heart contraction	0.1
Negative regulation of oxidative stress-induced cell death	0.1
Inositol lipid-mediated signaling	0.1
Protein localization to cell junction	0.1
Cellular response to toxic substance	0.1
Female pregnancy	0.1
Sphingoid metabolic process	0.11
Membrane raft organization	0.11
Myelination in peripheral nervous system	0.11
Peripheral nervous system axon ensheathment	0.11
Peroxisomal membrane transport	0.11
Positive regulation of coagulation	0.11
Positive regulation of dephosphorylation	0.11
Amino acid import	0.11
Regulation of ruffle assembly	0.11
Mammary gland duct morphogenesis	0.11
Negative regulation of Rho protein signal transduction	0.11
Regulation of actin filament-based movement	0.11
Regulation of gene silencing by RNA	0.11
Negative regulation of actin filament polymerization	0.11
[truncated: 553 more rows]
